# Supplementary material for: Acute Stress Responses Are Early Molecular Events of Retinal Degeneration in Abca4−/−Rdh8−/− Mice After Light Exposure
Source: PubMed Central journal article supplement — Invest Ophthalmol Vis Sci. 2016 Jun 17;57(7):3257–67. doi: 10.1167/iovs.15-18993 (PMC4928696; doi:10.1167/iovs.15-18993), 2016-06-17
Supplement: i1552-5783-57-7-3257-s01.pdf [file i1552-5783-57-7-3257-s01.pdf]

**Supplemental Table 1. Mouse and human primer sequences used in the study**

| <b>Gene</b>          | <b>Primer sequence</b>            | <b>Position</b> | <b>Size</b> | <b>Accession no</b> |
|----------------------|-----------------------------------|-----------------|-------------|---------------------|
| <i>Lcn2</i> (mouse)  | 5'-TGGCCACTTGCACATTGTAG-3'        | 274 - 255       | 147         | NM_008491           |
|                      | 5'-ATGTCACCTCCATCCTGGTC-3'        | 128 - 147       |             |                     |
| <i>Edn2</i> (mouse)  | 5'-TCCTGCAGCTCATGGTGTTA-3'        | 259 - 240       | 148         | NM_007902           |
|                      | 5'- ATGTGGACTGCTGAGGGAGA-3'       | 112 - 131       |             |                     |
| <i>Socs3</i> (mouse) | 5'- AACTTGCTGTGGGTGACCAT-3'       | 257 - 238       | 136         | NM_007707           |
|                      | 5'- AAGGCCGGAGATTTTCGCT-3'        | 122 - 141       |             |                     |
| <i>Rho</i> (mouse)   | 5'- CACTCGTTGGCTGGTCCAGGTAC-3'    | 275 - 256       | 191         | NM_145383           |
|                      | 5'- AGCCGCCTCCTTGACTGTGAAGA-3'    | 126 - 145       |             |                     |
| <i>Rdh12</i> (mouse) | 5'- GATACTGCAGTGCTTTTGCCTATGG-3'  | 256 - 237       | 134         | NM_030017           |
|                      | 5'- AGCCGCCATAGCAAACACAGCAGG-3'   | 123 - 142       |             |                     |
| <i>Rpe65</i> (mouse) | 5'- TACAACCTGCCACAGCCACTC-3'      | 218 - 199       | 161         | NM_029987           |
|                      | 5'- AGTGATTCAACCCAAGTCCG-3'       | 78 - 97         |             |                     |
| <i>Gapdh</i> (mouse) | 5'- GTGTTCTACCCCAATGTG-3'         | 173 - 154       | 132         | NM_008084.3         |
|                      | 5'- GGAGACAACCTGGTCCTCAG-3'       | 42 - 61         |             |                     |
| <i>LCN2</i> (human)  | 5'- TCA CCT CCG TCC TGT TTA GG-3' | 196 - 177       | 136         | NM_005564           |
|                      | 5'- CGA AGT CAG CTC CTT GGT TC-3' | 61 - 80         |             |                     |
| <i>GAPDH</i> (human) | 5'- CCATCCACAGTCTTCTGGGT-3'       | 568 - 549       | 141         | NM_002046           |
|                      | 5'- CCTCAAGATCATCAGCAAT-3'        | 428 - 447       |             |                     |
